# Supplementary material for: Tailoring chemical composition of solid electrolyte interphase by selective dissolution for long-life micron-sized silicon anode
Source: PubMed Central journal article supplement (PMC10636032; doi:10.1038/s41467-023-43093-6), 2023-11-09
Supplement: 41467_2023_43093_MOESM3_ESM.pdf [file 41467_2023_43093_MOESM3_ESM.pdf]

## Description of Additional Supplementary Files

**File Name: Supplementary Data 1**

**Description:** The initial and final MD configurations used to simulate the dissolution characterizations in GBL and EC solvents.
